# Supplementary material
Source: PubMed Central journal article supplement (PMC6323418)
Supplement: mmc1.pdf [file mmc1.pdf]

**The American Journal of Human Genetics, Volume 104**

**Supplemental Data**

**Leveraging Polygenic Functional Enrichment  
to Improve GWAS Power**

**Gleb Kichaev, Gaurav Bhatia, Po-Ru Loh, Steven Gazal, Kathryn Burch, Malika K. Freund, Armin Schoech, Bogdan Pasaniuc, and Alkes L. Price**

## Figures

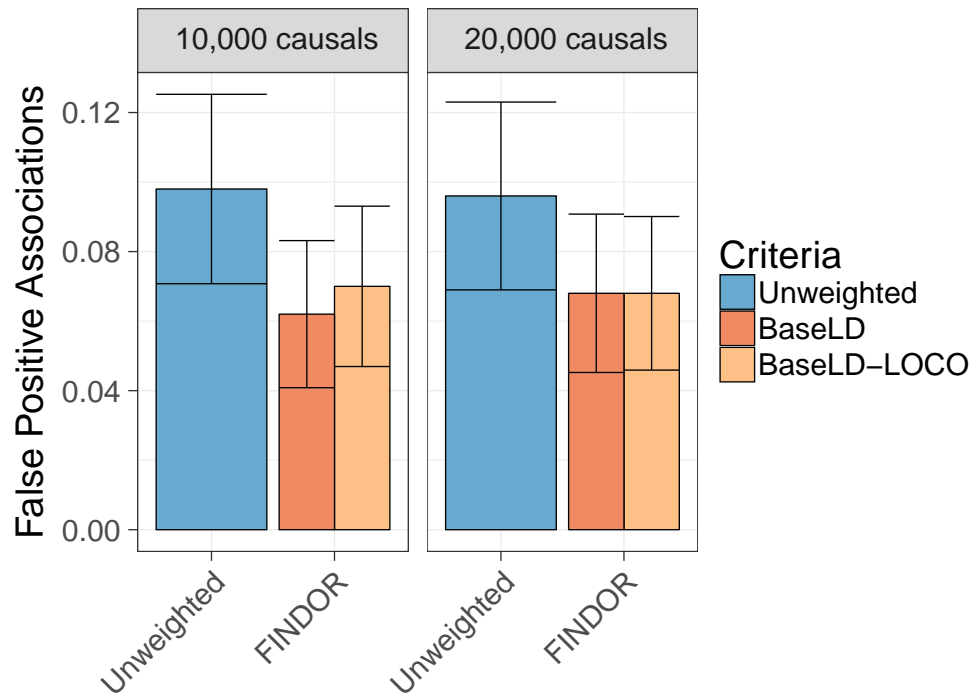

**Figure S 1: Null calibration for simulations in high power scenario.** We report the average number of independent, genome-wide significant ( $p < 5 \times 10^{-8}$ ) associations on null chromosomes in simulations with  $h_g^2 = 0.5$  and 100K individuals. Results are averaged across 500 simulations. Error bars represent 95% confidence intervals.

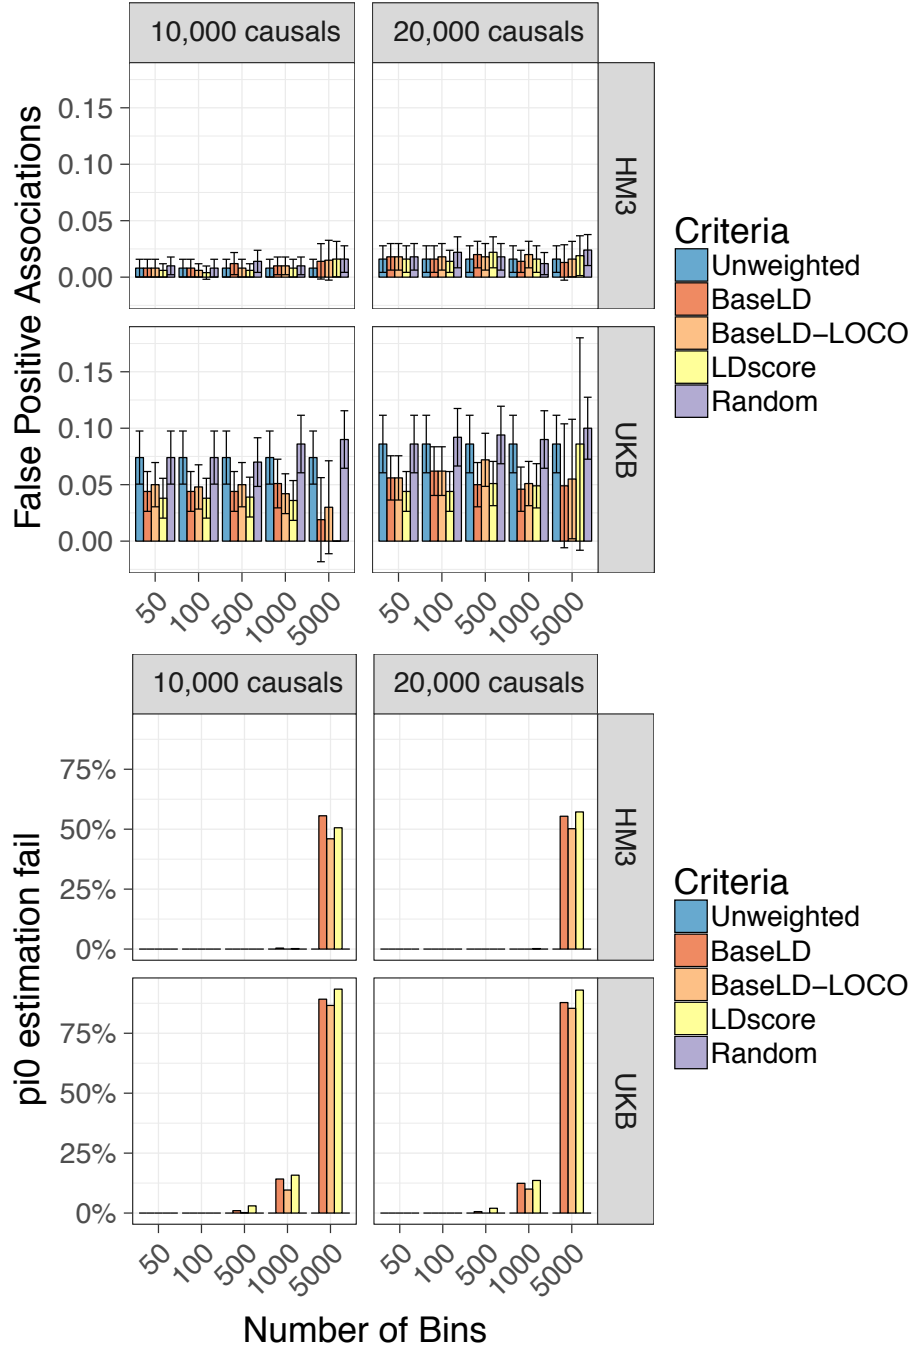

**Figure S 2: Top: Null calibration for different number of strata. Bottom: Percentage of simulations where estimation of  $\hat{\pi}_0$  failed.** We report the average number of independent, genome-wide significant ( $p < 5 \times 10^{-8}$ ) associations on null chromosomes in simulations with 100K individuals using different numbers of stratifying bins. The HM3 and UKB panels refer to an application of FINDOR to Hapmap3 (1.2M) or UKBiobank (9.6M) SNP sets. Results are averaged across 500 simulations. In the top figure, error bars represent 95% confidence intervals.

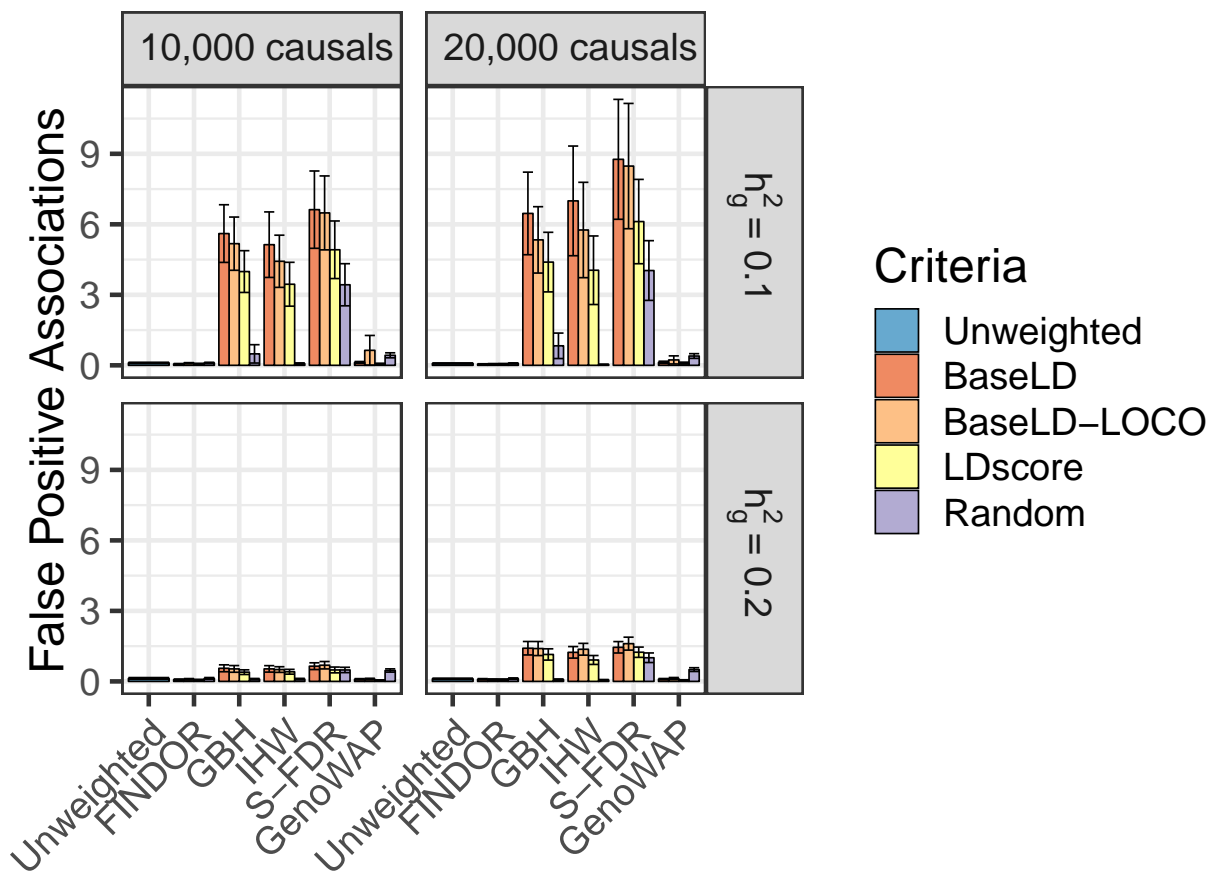

**Figure S 3: Null mis-calibration for GBH, IHW and S-FDR, and GenoWAP is worse at lower effective sample size (50K).** We report the average number of independent, genome-wide significant ( $p < 5 \times 10^{-8}$ ) associations on null chromosomes in simulations with 50K individuals (vs. 100K in Main Figure 1). Results are averaged across 500 simulations. Error bars represent 95% confidence intervals.

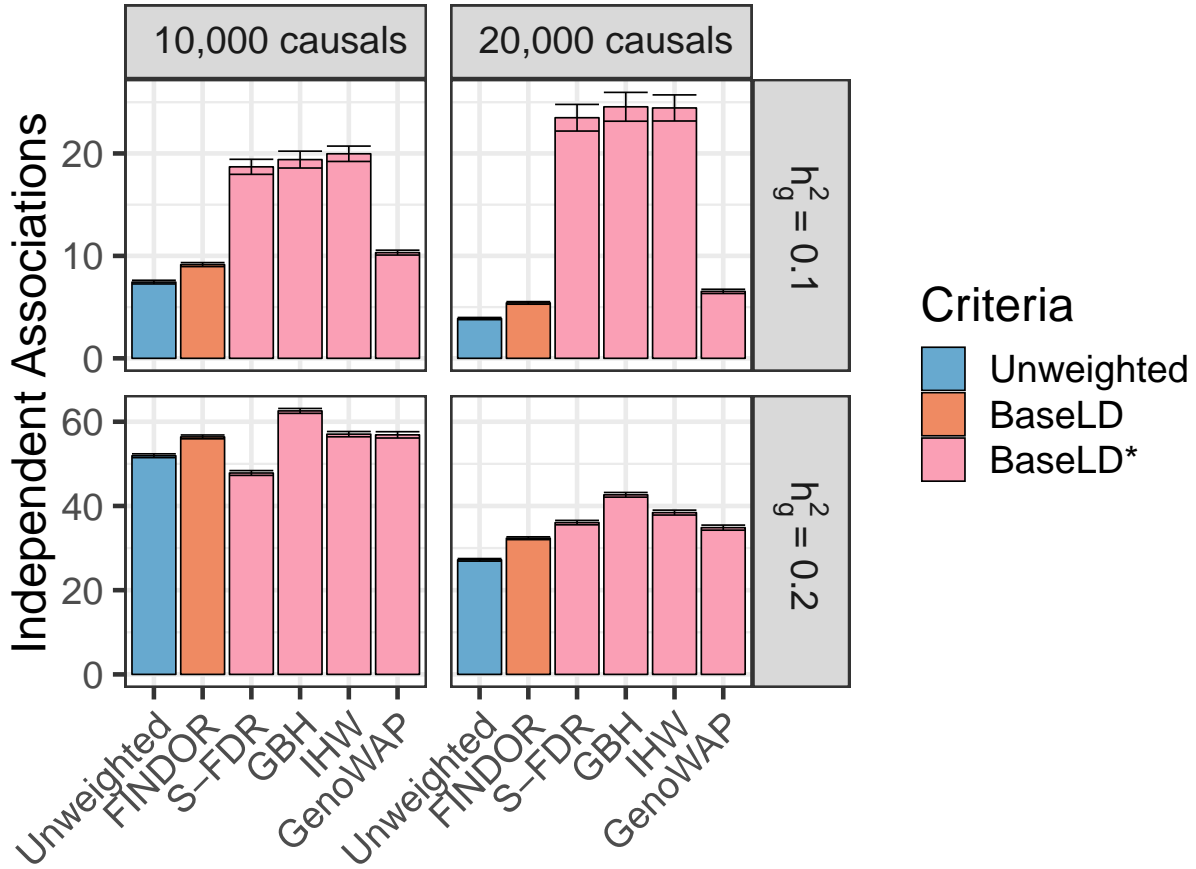

**Figure S 4: Power of FINDOR, IHW, GBH, S-FDR, and GenoWAP in simulations of causal loci.** We report the average number of independent, genome-wide significant ( $p < 5 \times 10^{-8}$ ) associations on causal chromosomes in simulations with 100K individuals for all four methods explored in this study using the BaseLD criteria. Methods that are susceptible to false positives (IHW, GBH and S-FDR; see Figure 1) are denoted using pink bars (BaseLD\*). Results are averaged across 1000 simulations. Error bars represent 95% confidence intervals.

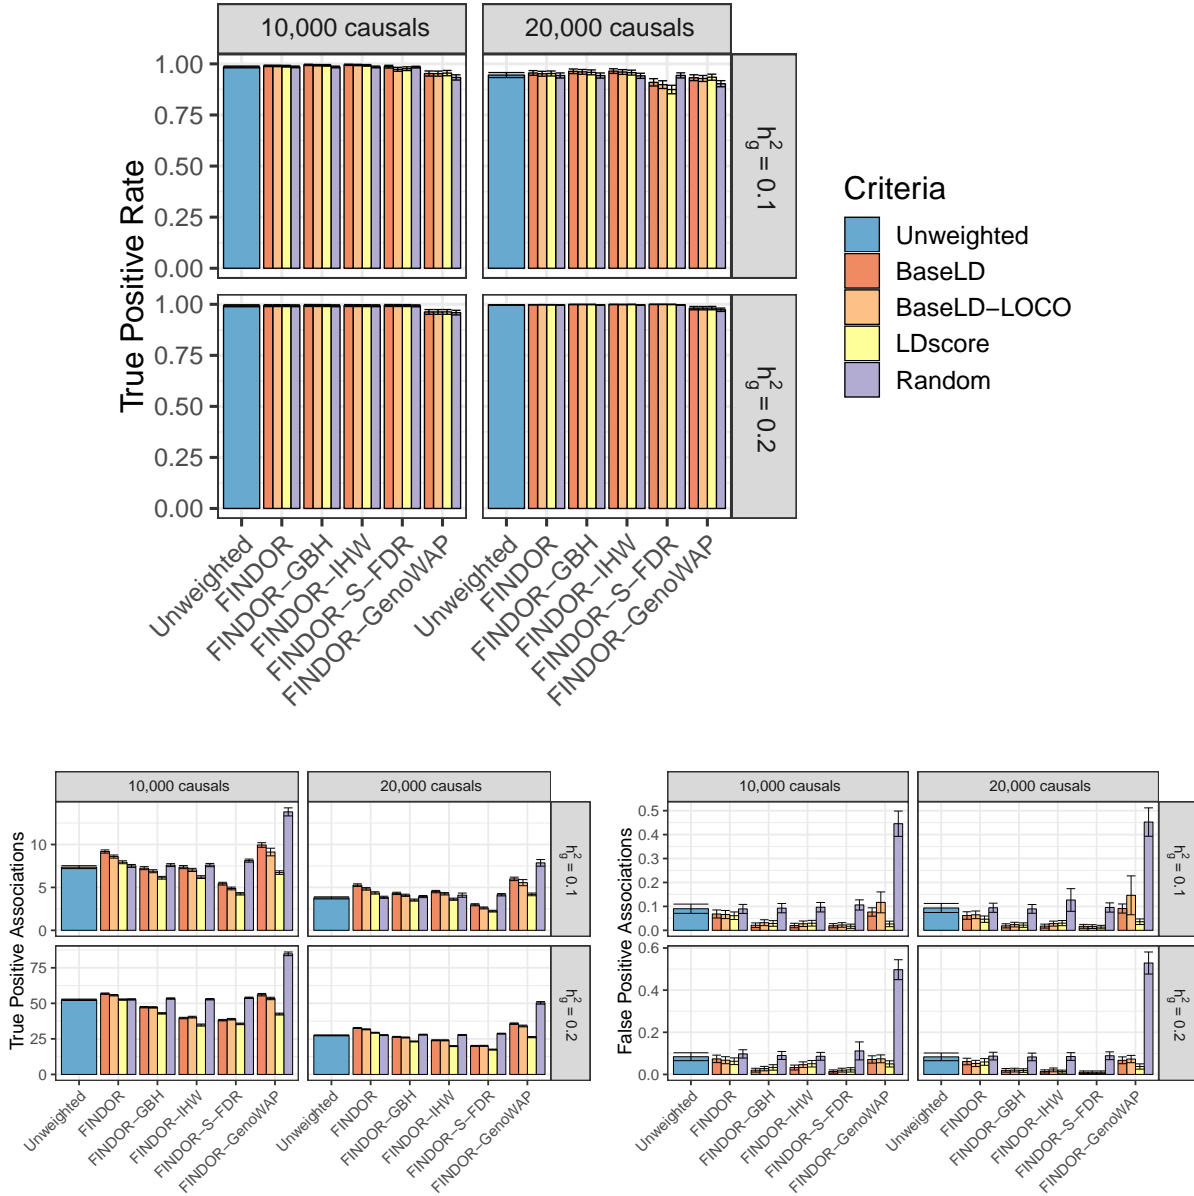

**Figure S 5: True positive rate of hybrid methods (FINDOR-GBH, FINDOR-IHW, FINDOR-S-FDR, FINDOR-GenoWAP).** Each hybrid method first runs FINDOR to compute the number of SNPs rejected at  $P = 5 \times 10^{-8}$  and then runs a second method (GBH, IHW, S-FDR, GenoWAP) to output the same number of SNPs as FINDOR rejects. For GBH, IHW and S-FDR, SNPs were ranked using weighted-FDR values. For GenoWAP, SNPs were ranked based on posterior probabilities. (Top) We report the true positive rate, defined as the ratio of the average number of independent associations that are true positives divided by the total number of independent associations. (Bottom-left) We report the average number of independent associations that are true positives. (Bottom-right) We report the average total number of independent associations that are false positives. Results are averaged across 1000 simulations. Error bars represent 95% confidence intervals.

# Tables

| Annotation                       | Proportion of SNPs | $h_g^2$ Enrichment | Tau      |
|----------------------------------|--------------------|--------------------|----------|
| All SNPs                         | 1                  | NaN                | -1.011   |
| Coding                           | 0.014              | 4.634              | 1.248    |
| Coding + 500bp                   | 0.064              | 1.523              | -1.303   |
| Conserved (GERP NS)              | -                  | 1.801              | 0.3244   |
| Conserved (GERP RS $\geq$ 4)     | 0.8                | 12.99              | 7.121    |
| Conserved (Lindblad-Toh)         | 0.026              | 9.353              | 6.166    |
| Conserved (Lindblad-Toh) + 500bp | 0.33               | 1.669              | -0.3263  |
| CTCF                             | 0.024              | 0.3465             | -1.074   |
| CTCF + 500bp                     | 0.071              | 0.7298             | -0.3127  |
| DGF                              | 0.136              | 2.062              | 0.1708   |
| DGF + 500bp                      | 0.538              | 1.367              | 0.05873  |
| DHS Peaks                        | 0.111              | 2.272              | 0.08154  |
| DHS                              | 0.166              | 2.017              | -0.5108  |
| DHS + 500bp                      | 0.496              | 1.3                | -0.1541  |
| FANTOM5 Enhancer                 | 0.4                | 1.296              | -1.391   |
| FANTOM5 Enhancer + 500bp         | 0.019              | 1.723              | -0.3048  |
| Enhancer                         | 0.042              | 2.724              | 0.6413   |
| Enhancer + 500bp                 | 0.09               | 2.113              | -0.1927  |
| Fetal DHS                        | 0.084              | 2.493              | 0.1489   |
| Fetal DHS + 500bp                | 0.283              | 1.581              | -0.1934  |
| H3K27ac (Hnisz)                  | 0.389              | 1.526              | -0.4566  |
| H3K27ac (Hnisz) + 500bp          | 0.42               | 1.534              | 0.5073   |
| H3K27ac (PGC2)                   | 0.269              | 1.716              | -0.546   |
| H3K27ac (PGC2) + 500bp           | 0.335              | 1.708              | 0.5095   |
| H3K4me1 Peaks                    | 0.17               | 2.254              | 0.5072   |
| H3K4me1                          | 0.424              | 1.71               | 0.5112   |
| H3K4me1 + 500bp                  | 0.606              | 1.338              | -0.2583  |
| H3K4me3 Peaks                    | 0.042              | 2.936              | 0.3316   |
| H3K4me3                          | 0.133              | 2.378              | 0.3035   |
| H3K4me3 + 500bp                  | 0.255              | 1.756              | -0.08552 |
| H3K9ac Peaks                     | 0.038              | 3.261              | 0.5507   |
| H3K9ac                           | 0.125              | 2.592              | 0.6866   |
| H3K9ac + 500bp                   | 0.23               | 1.915              | -0.232   |
| Intron                           | 0.387              | 1.11               | 2.252    |
| Intron + 500bp                   | 0.397              | 1.177              | -2.379   |
| Promoter Flanking                | 0.8                | 1.797              | -0.06156 |
| Promoter Flanking + 500bp        | 0.033              | 1.373              | -0.8093  |
| Promoter                         | 0.031              | 1.961              | 1.882    |
| Promoter + 500bp                 | 0.038              | 1.5                | -2.017   |
| Repressed                        | 0.461              | 0.7185             | 0.05893  |
| Repressed + 500bp                | 0.719              | 0.7835             | 0.1844   |
| Super Enhancer (Vahedi)          | 0.021              | 2.076              | 2.19     |
| Super Enhancer (Vahedi) + 500bp  | 0.021              | 2.017              | -2.265   |
| Super Enhancer (Hnisz)           | 0.167              | 1.814              | -1.809   |
| Super Enhancer (Hnisz) + 500bp   | 0.17               | 1.878              | 1.835    |
| Typical Enhancer                 | 0.022              | 1.698              | 0.995    |
| Typical Enhancer + 500bp         | 0.026              | 1.653              | -0.9213  |
| TFBS                             | 0.131              | 2.439              | 0.9492   |
| TFBS + 500bp                     | 0.341              | 1.499              | -0.1196  |
| Transcribed                      | 0.346              | 1.173              | 0.309    |
| Transcribed + 500bp              | 0.762              | 0.965              | -0.09606 |
| TSS                              | 0.018              | 3.469              | 0.7095   |
| TSS + 500bp                      | 0.034              | 2.916              | 0.1618   |
| 3 UTR                            | 0.011              | 2.905              | 0.3657   |
| 3 UTR + 500bp                    | 0.026              | 1.991              | -0.04583 |
| 5 UTR                            | 0.5                | 3.271              | 0.6998   |
| 5 UTR + 500bp                    | 0.027              | 1.581              | -0.3904  |
| Weak Enhancer                    | 0.021              | 1.69               | -0.4957  |
| Weak Enhancer + 500bp            | 0.089              | 1.41               | -0.4051  |
| MAF bin 1                        | 0.102              | 0.6522             | 0.5037   |
| MAF bin 2                        | 0.1                | 0.7087             | 0.5734   |
| MAF bin 3                        | 0.1                | 0.8438             | 0.7306   |
| MAF bin 4                        | 0.101              | 0.7483             | 0.6469   |
| MAF bin 5                        | 0.098              | 0.9875             | 0.9017   |
| MAF bin 6                        | 0.1                | 1.088              | 0.985    |
| MAF bin 7                        | 0.1                | 1.093              | 1.028    |
| MAF bin 8                        | 0.1                | 1.168              | 1.102    |
| MAF bin 9                        | 0.101              | 1.18               | 1.109    |
| MAF bin 10                       | 0.098              | 1.291              | 1.222    |
| MAF-Adjusted Allele Age          | -                  | NA                 | -0.2584  |
| LLD-AFR                          | -                  | NA                 | -0.2012  |
| Recombination Rate (10kb)        | -                  | 0.891              | -0.08077 |
| Nucleotide Diversity (10kb)      | -                  | 0.8324             | -0.05295 |
| Background Selection Statistic   | -                  | 1.238              | 0.6152   |
| CpG-Content (50kb)               | -                  | 1.162              | 41.6     |

**Table S 1: Generative  $\tau$  values used to simulate BaseLD enrichment.** Values are derived from a meta-analysis of 31 traits (see ref. [1]).



| Phenotype        | Replication Study                             | Discovery N | Replication N (max) |
|------------------|-----------------------------------------------|-------------|---------------------|
| BMI              | Locke et al. (Nature 2015) [2]                | 145,209     | 322,091             |
| Height           | Wood et al. (Nature 2014) [3]                 | 145,368     | 253,237             |
| WHR adjusted BMI | Shugin et al (Nature 2015) [4]                | 145,375     | 210,039             |
| Edu Years        | Rietveld et al. (Science 2013) [5]            | 144,204     | 126,559             |
| Eczema           | Paternoster et al. (Nature Genetics 2015) [6] | 145,416     | 40,835              |
| Type II Diabetes | Morris et al. (Nature Genetics 2012) [7]      | 145,298     | 29,842              |
| Ever Smoked      | Furberg et al. (Nature Genetics 2010) [8]     | 145,227     | 74,035              |
| Age at Menarche  | Perry et al. (Nature 2014) [9]                | 74,944      | 182,416             |
| Age at Menopause | Day et al (Nature Genetics 2015) [10]         | 44,410      | 69,360              |

**Table S 2: List of nine traits used for non-UK Biobank replication analysis.** We report the non-UK Biobank replication reference, UK Biobank discovery sample size and non-UK Biobank replication sample size for each trait.

| $h_g^2$ | # Causals | Criteria    | Unweighted     | FINDOR         | S-FDR          | GBH            | IHW            | GenoWAP        |
|---------|-----------|-------------|----------------|----------------|----------------|----------------|----------------|----------------|
| 0.1     | 10000     | BaseLD      | NA             | 0.066 (0.0086) | 0.47 (0.035)   | 0.4 (0.035)    | 0.38 (0.031)   | 0.094 (0.01)   |
|         |           | BaseLD-LOCO | NA             | 0.073 (0.009)  | 0.48 (0.035)   | 0.37 (0.033)   | 0.36 (0.033)   | 0.13 (0.039)   |
|         |           | LDscore     | NA             | 0.07 (0.0087)  | 0.4 (0.029)    | 0.29 (0.03)    | 0.29 (0.024)   | 0.032 (0.0057) |
|         |           | Random      | NA             | 0.11 (0.011)   | 0.37 (0.029)   | 0.072 (0.0088) | 0.071 (0.0089) | 0.5 (0.027)    |
|         |           | Unweighted  | 0.091 (0.0099) | NA             | NA             | NA             | NA             | NA             |
| 0.1     | 20000     | BaseLD      | NA             | 0.061 (0.013)  | 1.7 (0.21)     | 1.6 (0.24)     | 1.3 (0.18)     | 0.094 (0.01)   |
|         |           | BaseLD-LOCO | NA             | 0.073 (0.014)  | 1.8 (0.23)     | 1.6 (0.25)     | 1.5 (0.22)     | 0.15 (0.04)    |
|         |           | LDscore     | NA             | 0.066 (0.012)  | 1.4 (0.21)     | 1.2 (0.19)     | 1.1 (0.16)     | 0.049 (0.0074) |
|         |           | Random      | NA             | 0.1 (0.016)    | 1.2 (0.16)     | 0.086 (0.015)  | 0.076 (0.014)  | 0.46 (0.03)    |
|         |           | Unweighted  | 0.1 (0.016)    | NA             | NA             | NA             | NA             | NA             |
| 0.2     | 10000     | BaseLD      | NA             | 0.06 (0.008)   | 0.066 (0.0082) | 0.067 (0.0084) | 0.051 (0.0075) | 0.059 (0.0079) |
|         |           | BaseLD-LOCO | NA             | 0.058 (0.0079) | 0.068 (0.0085) | 0.062 (0.0081) | 0.058 (0.0077) | 0.055 (0.0076) |
|         |           | LDscore     | NA             | 0.064 (0.0081) | 0.059 (0.0078) | 0.055 (0.0078) | 0.048 (0.0071) | 0.027 (0.0053) |
|         |           | Random      | NA             | 0.093 (0.0099) | 0.096 (0.01)   | 0.081 (0.0092) | 0.081 (0.0092) | 0.56 (0.026)   |
|         |           | Unweighted  | 0.09 (0.0096)  | NA             | NA             | NA             | NA             | NA             |
| 0.2     | 20000     | BaseLD      | NA             | 0.059 (0.0076) | 0.09 (0.01)    | 0.081 (0.0093) | 0.064 (0.0083) | 0.072 (0.0084) |
|         |           | BaseLD-LOCO | NA             | 0.063 (0.008)  | 0.093 (0.01)   | 0.081 (0.0091) | 0.075 (0.0093) | 0.069 (0.0083) |
|         |           | LDscore     | NA             | 0.055 (0.0073) | 0.069 (0.0084) | 0.061 (0.008)  | 0.042 (0.0065) | 0.036 (0.0061) |
|         |           | Random      | NA             | 0.097 (0.0098) | 0.12 (0.011)   | 0.087 (0.0092) | 0.089 (0.0094) | 0.52 (0.025)   |
|         |           | Unweighted  | 0.098 (0.0098) | NA             | NA             | NA             | NA             | NA             |

**Table S 3: Numerical results for simulations of null loci (Figure 1).** We report the average number of independent, genome-wide significant ( $p < 5 \times 10^{-8}$ ) associations on null chromosomes. Results are averaged across 1000 simulations. Standard errors are reported in parentheses.

| $h_g^2$ | # Causals | log10 threshold | BaseLD          | BaseLD (LOCO)   | LDscore         | Random          | Unweighted      |
|---------|-----------|-----------------|-----------------|-----------------|-----------------|-----------------|-----------------|
| 0.1     | 10000     | -8              | 1.07 (0.79)     | 0.96 (0.74)     | 0.89 (0.68)     | 0.52 (0.32)     | 0.51 (0.32)     |
|         |           | -7              | 3.9 (1.14)      | 3.99 (1.05)     | 3.66 (1.03)     | 3.45 (0.8)      | 3.49 (0.82)     |
|         |           | -6              | 27.77 (1.77)    | 28.27 (1.72)    | 25.91 (1.61)    | 26.16 (1.34)    | 26.27 (1.35)    |
|         |           | -5              | 257.06 (4.68)   | 260.59 (4.47)   | 246.15 (4.18)   | 243.82 (2.94)   | 244.22 (2.98)   |
|         |           | -4              | 2497.25 (16.01) | 2534.26 (15.07) | 2471.05 (15.68) | 2425.97 (9.73)  | 2421.79 (9.93)  |
| 0.1     | 20000     | -8              | 0.23 (0.08)     | 0.26 (0.08)     | 0.29 (0.09)     | 0.29 (0.08)     | 0.26 (0.07)     |
|         |           | -7              | 2.22 (0.35)     | 2.12 (0.31)     | 2.02 (0.31)     | 2.48 (0.28)     | 2.45 (0.28)     |
|         |           | -6              | 25.41 (1.73)    | 25.34 (1.67)    | 23.31 (1.43)    | 23.86 (1.07)    | 24.01 (1.1)     |
|         |           | -5              | 253.37 (6.05)   | 258.33 (6)      | 239.84 (5.62)   | 241.9 (3.75)    | 241.82 (3.8)    |
|         |           | -4              | 2505.8 (25.29)  | 2552.36 (24.37) | 2450.59 (23.69) | 2429.73 (15.65) | 2424.49 (15.96) |
| 0.2     | 10000     | -8              | 0.57 (0.25)     | 0.59 (0.26)     | 0.51 (0.26)     | 0.33 (0.09)     | 0.31 (0.08)     |
|         |           | -7              | 2.89 (0.4)      | 2.81 (0.4)      | 2.57 (0.39)     | 2.67 (0.35)     | 2.65 (0.35)     |
|         |           | -6              | 27.3 (1.85)     | 27.16 (1.64)    | 26.69 (1.92)    | 24.99 (0.81)    | 25.05 (0.82)    |
|         |           | -5              | 253.01 (4.7)    | 258.05 (4.63)   | 260.4 (5)       | 247.23 (2.89)   | 247.72 (2.93)   |
|         |           | -4              | 2433.43 (14.02) | 2485.62 (13.81) | 2467.72 (14.75) | 2444.87 (10.06) | 2439.6 (10.15)  |
| 0.2     | 20000     | -8              | 0.24 (0.06)     | 0.25 (0.06)     | 0.2 (0.06)      | 0.22 (0.05)     | 0.22 (0.05)     |
|         |           | -7              | 2.13 (0.23)     | 2.25 (0.24)     | 2.15 (0.2)      | 2.29 (0.17)     | 2.31 (0.18)     |
|         |           | -6              | 24.09 (1.01)    | 24.73 (0.99)    | 24.37 (1.03)    | 24.28 (0.69)    | 24.36 (0.71)    |
|         |           | -5              | 241.74 (3.9)    | 249.05 (3.76)   | 246.46 (4.15)   | 245.44 (2.67)   | 246.35 (2.71)   |
|         |           | -4              | 2414.67 (14.36) | 2468.78 (13.93) | 2468.45 (14.56) | 2431.91 (9.74)  | 2426.62 (9.81)  |

**Table S 4: FINDOR is well-calibrated at less stringent significance thresholds in simulations of null loci.** We report the average *total number of associated SNPs* on null chromosomes at various significance thresholds. (In contrast to our main simulations, we do not report the average number of independent associations, due to problems with clumping using PLINK at less significant thresholds.) Results are averaged across 1000 simulations. Standard errors are reported in parentheses.

| $h_g^2$ | # Causals | Criteria   | FINDOR       | Unweighted   | % Improve |
|---------|-----------|------------|--------------|--------------|-----------|
| 0.1     | 10,000    | Baseline   | 8.92 (0.1)   | NA           | 20.00     |
|         |           | BaseLD     | 9.15 (0.1)   | NA           | 23.00     |
|         |           | LDscore    | 7.95 (0.095) | NA           | 6.90      |
|         |           | Random     | 7.59 (0.092) | NA           | 2.00      |
|         |           | Unweighted | NA           | 7.44 (0.092) | 0         |
| 0.1     | 20,000    | Baseline   | 5.28 (0.12)  | NA           | 34.00     |
|         |           | BaseLD     | 5.45 (0.12)  | NA           | 38.00     |
|         |           | LDscore    | 4.5 (0.11)   | NA           | 14.00     |
|         |           | Random     | 4.02 (0.1)   | NA           | 2.00      |
|         |           | Unweighted | NA           | 3.94 (0.1)   | 0         |
| 0.2     | 10,000    | Baseline   | 55.4 (0.23)  | NA           | 6.70      |
|         |           | BaseLD     | 56.4 (0.23)  | NA           | 8.70      |
|         |           | LDscore    | 52.2 (0.23)  | NA           | 0.58      |
|         |           | Random     | 52.3 (0.23)  | NA           | 0.77      |
|         |           | Unweighted | NA           | 51.9 (0.23)  | 0         |
| 0.2     | 20,000    | Baseline   | 31.5 (0.16)  | NA           | 16.00     |
|         |           | BaseLD     | 32.3 (0.17)  | NA           | 19.00     |
|         |           | LDscore    | 29.1 (0.16)  | NA           | 7.00      |
|         |           | Random     | 27.4 (0.16)  | NA           | 0.74      |
|         |           | Unweighted | NA           | 27.2 (0.15)  | 0         |

**Table S 5: Numerical results for simulations of causal loci (Figure 2).** We report the average number of independent, genome-wide significant ( $p < 5 \times 10^{-8}$ ) associations on causal chromosomes. Results are averaged across 1000 simulations. Standard errors are reported in parentheses.

| Trait                             | Baseline | BaseLD | LDscore | Random | Unweighted |
|-----------------------------------|----------|--------|---------|--------|------------|
| Eosinophil Count                  | 198      | 200    | 189     | 188    | 187        |
| Mean Corpular Hemoglobin          | 247      | 248    | 233     | 237    | 237        |
| Red Blood Cell Distribution Width | 205      | 212    | 201     | 199    | 198        |
| Red Blood Cell Count              | 201      | 206    | 191     | 192    | 192        |
| White Blood Cell Count            | 158      | 165    | 148     | 148    | 148        |
| Heel T Score                      | 308      | 308    | 295     | 302    | 300        |
| Balding Type I                    | 96       | 100    | 92      | 96     | 96         |
| Body Mass Index                   | 126      | 132    | 119     | 117    | 117        |
| Height                            | 685      | 690    | 668     | 675    | 674        |
| Waist-hip Ratio                   | 102      | 104    | 100     | 99     | 98         |
| Systolic Blood Pressure           | 105      | 106    | 98      | 96     | 98         |
| Years of Education                | 19       | 24     | 18      | 17     | 17         |
| Smoking Status                    | 22       | 24     | 21      | 19     | 18         |
| Auto Immune Traits                | 15       | 18     | 14      | 14     | 14         |
| Eczema                            | 43       | 46     | 39      | 34     | 35         |
| Cardiovascular Diseases           | 47       | 49     | 39      | 41     | 38         |
| Hypothyroidism                    | 27       | 30     | 27      | 27     | 27         |
| Respiratory and Disease           | 26       | 29     | 24      | 25     | 24         |
| Type 2 Diabetes                   | 16       | 14     | 13      | 15     | 14         |
| FEV1-FVC Ratio                    | 178      | 185    | 172     | 174    | 174        |
| Forced Vital Capacity (FVC)       | 99       | 99     | 94      | 91     | 90         |
| Neuroticism                       | 15       | 16     | 10      | 11     | 11         |
| Morning Person                    | 12       | 14     | 13      | 14     | 14         |
| Hair Color                        | 142      | 143    | 139     | 139    | 140        |
| Sunburn Occasion                  | 24       | 25     | 23      | 22     | 23         |
| Age at Menarche                   | 56       | 56     | 54      | 52     | 52         |
| Age at Menopause                  | 17       | 18     | 17      | 17     | 18         |
| Total                             | 3189     | 3261   | 3051    | 3061   | 3054       |
| Difference                        | 135      | 207    | -3      | 7      | 0          |
| Jackknife SE                      | 17.22    | 20.41  | 14.56   | 5.88   | 0          |

**Table S 6: Results for FINDOR with different stratification criteria in the 145K UK Biobank release.** For each trait, we report the number of independent, genome-wide significant loci identified by the Unweighted approach and by FINDOR with various stratification criteria in the 145K UK Biobank release.

**Table S 7: List of independent, genome-wide significant loci for all 27 traits in 145K and 460K UK Biobank releases.** We report independent, genome-wide significant loci for both Unweighted and FINDOR. See Excel file.

| Class          | 145K              |               |                    |                    | 459K              |               |                     |                    |
|----------------|-------------------|---------------|--------------------|--------------------|-------------------|---------------|---------------------|--------------------|
|                | # Loci Unweighted | # Loci FINDOR | Overall % Increase | Average % Increase | # Loci Unweighted | # Loci FINDOR | Overall % Increase. | Average % Increase |
| Anthropometric | 1285              | 1334          | 4%                 | 6%                 | 5227              | 5353          | 2%                  | 4%                 |
| Blood Cell     | 962               | 1031          | 7%                 | 8%                 | 3669              | 3831          | 4%                  | 4%                 |
| Disease        | 152               | 186           | 22%                | 20%                | 860               | 946           | 10%                 | 10%                |
| Other          | 655               | 710           | 8%                 | 15%                | 3527              | 3736          | 6%                  | 7%                 |
| Overall        | 3054              | 3261          | 7%                 | 13%                | 13283             | 13866         | 4%                  | 7%                 |

**Table S 8: Results for each phenotype class in 145K and 459K UK Biobank releases.** For each phenotype class, we report the number of independent, genome-wide significant loci identified by the Unweighted approach and by FINDOR in the 145K and 459K UK Biobank releases.

| Trait                             | Baseline | BaseLD | LDscore | Random | Unweighted |
|-----------------------------------|----------|--------|---------|--------|------------|
| Eosinophil Count                  | 166      | 164    | 157     | 159    | 159        |
| Mean Corpular Hemoglobin          | 209      | 210    | 200     | 203    | 203        |
| Red Blood Cell Distribution Width | 165      | 170    | 159     | 160    | 160        |
| Red Blood Cell Count              | 164      | 167    | 153     | 153    | 154        |
| White Blood Cell Count            | 119      | 120    | 112     | 114    | 112        |
| Heel T Score                      | 244      | 250    | 238     | 240    | 239        |
| Balding Type I                    | 79       | 83     | 75      | 75     | 76         |
| Body Mass Index                   | 79       | 82     | 76      | 78     | 78         |
| Height                            | 563      | 568    | 539     | 538    | 538        |
| Waist-hip Ratio                   | 79       | 75     | 74      | 71     | 70         |
| Systolic Blood Pressure           | 75       | 75     | 73      | 73     | 71         |
| Years of Education                | 10       | 11     | 10      | 10     | 10         |
| Smoking Status                    | 11       | 13     | 8       | 7      | 7          |
| Auto Immune Traits                | 11       | 11     | 10      | 9      | 10         |
| Eczema                            | 27       | 28     | 27      | 24     | 24         |
| Cardiovascular Diseases           | 30       | 30     | 29      | 28     | 29         |
| Hypothyroidism                    | 22       | 23     | 23      | 23     | 24         |
| Respiratory and Disease           | 21       | 22     | 18      | 20     | 19         |
| Type 2 Diabetes                   | 9        | 9      | 7       | 10     | 10         |
| FEV1-FVC Ratio                    | 135      | 138    | 131     | 134    | 134        |
| Forced Vital Capacity (FVC)       | 62       | 63     | 58      | 57     | 57         |
| Neuroticism                       | 5        | 8      | 5       | 5      | 5          |
| Morning Person                    | 6        | 5      | 5       | 5      | 5          |
| Hair Color                        | 117      | 122    | 119     | 121    | 121        |
| Sunburn Occasion                  | 20       | 20     | 18      | 18     | 18         |
| Age at Menarche                   | 39       | 39     | 37      | 39     | 38         |
| Age at Menopause                  | 14       | 14     | 13      | 14     | 14         |
| Total                             | 2545     | 2582   | 2438    | 2452   | 2450       |
| Difference                        | 95       | 132    | -12     | 2      | 0          |
| Jackknife SE                      | 15.83    | 16.72  | 10.14   | 5.28   | 0          |

**Table S 9: Results for FINDOR with different stratification criteria with p-value threshold of  $5 \times 10^{-9}$  in the 145K UK Biobank release.** For each trait, we report the number of independent,  $p < 5 \times 10^{-9}$  loci identified by the Unweighted approach and by FINDOR with various stratification criteria in the 145K UK Biobank release.

| Locus class     | Rep Slope | SE    | Num Loci |
|-----------------|-----------|-------|----------|
| Both Methods    | 0.910     | 0.003 | 2766     |
| FINDOR only     | 0.661     | 0.018 | 230      |
| Unweighted only | 0.572     | 0.043 | 49       |

**Table S 10: : Numerical results for UK Biobank replication analysis of novel FINDOR loci (Figure 4, left panel).** For loci detected using Both Methods, FINDOR only, or Unweighted only, respectively, we report results of a regression of standardized effect sizes ( $\frac{Z}{\sqrt{N}}$ ) at lead SNPs in UK Biobank replication data vs. UK Biobank discovery data.

| Locus class     | Rep Slope | SE     | Num Loci |
|-----------------|-----------|--------|----------|
| Both Methods    | 0.920     | 0.004  | 2418     |
| IHW only        | 0.645     | 0.020  | 340      |
| Unweighted only | 0.790     | 0.016  | 373      |
| Locus class     | Rep Slope | SE     | Num Loci |
| Both Methods    | 0.913     | 0.004  | 2663     |
| GBH only        | 0.666     | 0.0177 | 466      |
| Unweighted only | 0.721     | 0.029  | 128      |
| Locus class     | Rep Slope | SE     | Num Loci |
| Both Methods    | 0.915     | 0.004  | 2639     |
| S-FDR only      | 0.687     | 0.014  | 535      |
| Unweighted only | 0.694     | 0.027  | 152      |
| Locus class     | Rep Slope | SE     | Num Loci |
| Both Methods    | 0.913     | 0.004  | 2659     |
| GenoWAP only    | 0.657     | 0.013  | 511      |
| Unweighted only | 0.735     | 0.032  | 154      |

**Table S 11: Numerical results for UK Biobank replication analysis of novel IHW, GBH , S-FDR loci, and GenoWAP .** For loci detected using Both Methods, IHW/GBH/S-FDR/GenoWAP only, or Unweighted only, respectively, we report results of a regression of standardized effect sizes ( $\frac{Z}{\sqrt{N}}$ ) at lead SNPs in UK Biobank replication data vs. UK Biobank discovery data.

| Locus class     | Rep Slope | SE    | Num Loci |
|-----------------|-----------|-------|----------|
| Both Methods    | 0.702     | 0.046 | 94       |
| FINDOR only     | 0.516     | 0.062 | 23       |
| Unweighted only | 0.568     | 0.200 | 3        |
| Locus class     | Rep Slope | SE    | Num Loci |
| Both Methods    | 0.748     | 0.044 | 71       |
| IHW only        | 0.190     | 0.069 | 59       |
| Unweighted only | 0.520     | 0.116 | 26       |
| Locus class     | Rep Slope | SE    | Num Loci |
| Both Methods    | 0.721     | 0.047 | 84       |
| GBH only        | 0.237     | 0.068 | 60       |
| Unweighted only | 0.499     | 0.130 | 13       |
| Locus class     | Rep Slope | SE    | Num Loci |
| Both Methods    | 0.723     | 0.048 | 85       |
| S-FDR only      | 0.332     | 0.061 | 65       |
| Unweighted only | 0.460     | 0.128 | 12       |
| Locus class     | Rep Slope | SE    | Num Loci |
| Both Methods    | 0.737     | 0.044 | 85       |
| GenoWAP only    | 0.409     | 0.051 | 53       |
| Unweighted only | 0.293     | 0.166 | 15       |

**Table S 12: Numerical results for UK Biobank replication analysis of novel IHW, GBH , S-FDR loci, and GenoWAP restricted to traits with lower power.** For loci detected using Both Methods, FINDOR/IHW/GBH/S-FDR/GenoWAP only, or Unweighted only, respectively, we report results of a regression of standardized effect sizes ( $\frac{Z}{\sqrt{N}}$ ) at lead SNPs in UK Biobank replication data vs. UK Biobank discovery data. Results are restricted to traits with lower power, defined as the five traits with <20 independent GWAS loci identified using the Unweighted method

| Locus class     | Rep Slope | SE    | Num Loci |
|-----------------|-----------|-------|----------|
| Both Methods    | 0.672     | 0.012 | 411      |
| FINDOR only     | 0.682     | 0.111 | 31       |
| Unweighted only | NA        | NA    | 1        |

**Table S 13: : Numerical results for independent non-UK Biobank replication analysis of novel FINDOR loci (Figure 4, right panel).** For loci detected using Both Methods, FINDOR only, or Unweighted only, respectively, we report results of a regression of standardized effect sizes ( $\frac{Z}{\sqrt{N}}$ ) at lead SNPs in independent non-UK Biobank replication data vs. UK Biobank discovery data.

| Locus class     | Rep Slope | SE    | Num Loci |
|-----------------|-----------|-------|----------|
| Both Methods    | 0.680     | 0.013 | 366      |
| IHW only        | 0.574     | 0.066 | 58       |
| Unweighted only | 0.581     | 0.035 | 45       |
| Locus class     | Rep Slope | SE    | Num Loci |
| Both Methods    | 0.673     | 0.013 | 396      |
| GBH only        | 0.638     | 0.057 | 73       |
| Unweighted only | 0.612     | 0.072 | 15       |
| Locus class     | Rep Slope | SE    | Num Loci |
| Both Methods    | 0.675     | 0.013 | 390      |
| S-FDR only      | 0.568     | 0.048 | 93       |
| Unweighted only | 0.594     | 0.067 | 21       |
| Locus class     | Rep Slope | SE    | Num Loci |
| Both Methods    | 0.675     | 0.013 | 395      |
| GenoWAP only    | 0.567     | 0.049 | 82       |
| Unweighted only | 0.569     | 0.054 | 18       |

**Table S 14: Numerical results for independent non-UK Biobank replication analysis of novel IHW, GBH, S-FDR, and GenoWAP loci.** For loci detected using Both Methods, IHW/GBH/S-FDR/GenoWAP only, or Unweighted only, respectively, we report results of a regression of standardized effect sizes ( $\frac{Z}{\sqrt{N}}$ ) at lead SNPs in independent non-UK Biobank replication data vs. UK Biobank discovery data.



| Trait                             | Baseline | BaseLD | LDscore | Random | Unweighted |
|-----------------------------------|----------|--------|---------|--------|------------|
| Eosinophil Count                  | 710      | 731    | 686     | 700    | 699        |
| Mean Corpular Hemoglobin          | 791      | 791    | 758     | 766    | 765        |
| Red Blood Cell Distribution Width | 677      | 674    | 641     | 651    | 652        |
| Red Blood Cell Count              | 878      | 885    | 834     | 839    | 840        |
| White Blood Cell Count            | 744      | 750    | 710     | 713    | 713        |
| Heel T Score                      | 1148     | 1149   | 1113    | 1127   | 1130       |
| Balding Type I                    | 346      | 346    | 335     | 335    | 334        |
| Body Mass Index                   | 930      | 950    | 913     | 907    | 908        |
| Height                            | 2397     | 2402   | 2354    | 2395   | 2395       |
| Waist-hip Ratio                   | 496      | 506    | 472     | 458    | 460        |
| Systolic Blood Pressure           | 694      | 703    | 661     | 664    | 666        |
| Years of Education                | 302      | 315    | 293     | 287    | 286        |
| Smoking Status                    | 169      | 178    | 164     | 154    | 154        |
| Auto Immune Traits                | 84       | 86     | 72      | 75     | 75         |
| Eczema                            | 191      | 198    | 179     | 182    | 181        |
| Cardiovascular Diseases           | 304      | 314    | 286     | 285    | 285        |
| Hypothyroidism                    | 151      | 153    | 141     | 140    | 139        |
| Respiratory and Disease           | 108      | 109    | 98      | 105    | 104        |
| Type 2 Diabetes                   | 87       | 86     | 80      | 78     | 76         |
| FEV1-FVC Ratio                    | 703      | 714    | 684     | 684    | 684        |
| Forced Vital Capacity (FVC)       | 559      | 565    | 541     | 543    | 544        |
| Neuroticism                       | 143      | 149    | 136     | 128    | 128        |
| Morning Person                    | 161      | 165    | 159     | 156    | 156        |
| Hair Color                        | 433      | 436    | 427     | 429    | 428        |
| Sunburn Occasion                  | 82       | 82     | 74      | 79     | 78         |
| Age at Menarche                   | 326      | 338    | 318     | 318    | 318        |
| Age at Menopause                  | 89       | 91     | 85      | 86     | 85         |
| Total                             | 13703    | 13866  | 13214   | 13284  | 13283      |
| Difference                        | 420      | 583    | -69     | 1      | 0          |
| Jackknife SE                      | 39.95    | 40.64  | 33.81   | 10.02  | 0          |

**Table S 15: Results for FINDOR with different stratification criteria in the 459K UK Biobank release.** For each trait, we report the number of independent, genome-wide significant loci identified by the Unweighted approach and by FINDOR with various stratification criteria in the 459K UK Biobank release.

|      |                 | % of lead SNPs within 95% credible set |               |                   |
|------|-----------------|----------------------------------------|---------------|-------------------|
| Data | Method          | GTEX_GE                                | BLUEPRINT_GE  | BLUEPRINT_H3K27ac |
| 145K | FINDOR-only     | 17.6% (2.4%)                           | 10.2% (1.9%)  | 21.2% (2.6%)      |
|      | Unweighted-only | 0.0% (0.0%)                            | 0.0% (0.0%)   | 2.0% (1.9%)       |
| 459K | FINDOR-only     | 13.6% (1.2%)                           | 7.1% (0.9%)   | 23.4% (1.5%)      |
|      | Unweighted-only | 5.4% (1.7%)                            | 3.0% (1.3%)   | 10.7% (2.4%)      |
|      |                 | Average Posterior Probability          |               |                   |
| Data | Method          | GTEX_GE                                | BLUEPRINT_GE  | BLUEPRINT_H3K27ac |
| 145K | FINDOR-only     | 0.052 (0.012)                          | 0.029 (0.009) | 0.039 (0.009)     |
|      | Unweighted-only | NA                                     | NA            | 0.015 (0.015)     |
| 459K | FINDOR-only     | 0.037 (0.006)                          | 0.025 (0.005) | 0.055 (0.006)     |
|      | Unweighted-only | 0.025 (0.011)                          | 0.008 (0.006) | 0.032 (0.011)     |

**Table S 16: Novel loci identified by FINDOR are more likely to be molecular QTL.** Top panel: for lead SNPs at loci detected using FINDOR only or Unweighted only, in both 145K and 459K UK Biobank releases, we report the % of lead SNPs that lie inside 95% causal sets for three molecular QTL, as described in ref. [11]. Bottom panel: for lead SNPs at loci detected using FINDOR only or Unweighted only, in both 145K and 459K UK Biobank releases, we report the average causal posterior probabilities for three molecular QTL, as described in ref. [11].

| Trait                                    | Unweighted | FINDOR+VEP | % improve |
|------------------------------------------|------------|------------|-----------|
| Eosinophil Count                         | 187        | 211        | 13%       |
| Mean Corpular Hemoglobin                 | 237        | 260        | 10%       |
| Red Blood Cell Distribution Width        | 198        | 219        | 11%       |
| Red Blood Cell Count                     | 192        | 213        | 11%       |
| White Blood Cell Count                   | 148        | 168        | 14%       |
| Heel T Score                             | 300        | 326        | 9%        |
| Balding Type I                           | 96         | 102        | 6%        |
| Body Mass Index                          | 117        | 139        | 19%       |
| Height                                   | 674        | 725        | 8%        |
| Waist-hip Ratio                          | 98         | 107        | 9%        |
| Auto Immune Traits                       | 14         | 16         | 14%       |
| Eczema                                   | 35         | 47         | 34%       |
| Cardiovascular Diseases                  | 38         | 60         | 58%       |
| Hypothyroidism                           | 27         | 34         | 26%       |
| Respiratory and Ear-nose-throat Diseases | 24         | 29         | 21%       |
| Type 2 Diabetes                          | 14         | 18         | 29%       |
| FEV1-FVC Ratio                           | 174        | 187        | 7%        |
| Forced Vital Capacity (FVC)              | 90         | 107        | 19%       |
| Neuroticism                              | 11         | 15         | 36%       |
| Morning Person                           | 14         | 17         | 21%       |
| Hair Color                               | 140        | 145        | 4%        |
| Sunburn Occasion                         | 23         | 26         | 13%       |
| Age at Menarche                          | 52         | 58         | 12%       |
| Age at Menopause                         | 18         | 19         | 6%        |
| Systolic Blood Pressure                  | 98         | 122        | 24%       |
| Years of Education                       | 17         | 31         | 82%       |
| Smoking Status                           | 18         | 27         | 50%       |
| Overall                                  | 3054       | 3428       | 12%       |
| Average-Per-Trait                        | 113        | 127        | 21%       |

**Table S 17: Number of independent loci discovered in the interim UK Biobank release by incorporating Variant Effect Predictor (VEP) annotation weights from ref. [12] into FINDOR.** We compiled VEP annotations and classified SNPs using the same High, Medium, and Low effect classification scheme proposed in ref. [12]. FINDOR weights were then multiplied by the weights reported in ref. [12] (165, 33, and 3 for High, Medium and Low categories, respectively), and re-normalized to have mean 1. For each trait, we report the total number of independent, genome-wide significant loci ( $p < 5 \times 10^{-8}$ ) identified by the Unweighted approach and by FINDOR with BaseLD+VEP.

## References

1. S. Gazal, H. K. Finucane, N. A. Furlotte, P.-R. Loh, P. F. Palamara, X. Liu, A. Schoech, B. Bulik-Sullivan, B. M. Neale, A. Gusev, et al., Linkage disequilibrium-dependent architecture of human complex traits shows action of negative selection, *Nature Genetics* 49 (10) (2017) 1421–1427.
2. A. E. Locke, B. Kahali, S. I. Berndt, A. E. Justice, T. H. Pers, F. R. Day, C. Powell, S. Vedantam, M. L. Buchkovich, J. Yang, et al., Genetic studies of body mass index yield new insights for obesity biology, *Nature* 518 (7538) (2015) 197–206.
3. A. R. Wood, T. Esko, J. Yang, S. Vedantam, T. H. Pers, S. Gustafsson, A. Y. Chu, K. Estrada, J. Luan, Z. Kutalik, et al., Defining the role of common variation in the genomic and biological architecture of adult human height, *Nature genetics* 46 (11) (2014) 1173–1186.
4. D. Shungin, T. W. Winkler, D. C. Croteau-Chonka, T. Ferreira, A. E. Locke, R. Mägi, R. J. Strawbridge, T. H. Pers, K. Fischer, A. E. Justice, et al., New genetic loci link adipose and insulin biology to body fat distribution, *Nature* 518 (7538) (2015) 187–196.
5. C. A. Rietveld, S. E. Medland, J. Derringer, J. Yang, T. Esko, N. W. Martin, H.-J. Westra, K. Shakhbazov, A. Abdellaoui, A. Agrawal, et al., Gwas of 126,559 individuals identifies genetic variants associated with educational attainment, *science* 340 (6139) (2013) 1467–1471.
6. L. Paternoster, M. Standl, J. Waage, H. Baurecht, M. Hotze, D. P. Strachan, J. A. Curtin, K. Bønnelykke, C. Tian, A. Takahashi, et al., Multi-ethnic genome-wide association study of 21,000 cases and 95,000 controls identifies new risk loci for atopic dermatitis, *Nature genetics* 47 (12) (2015) 1449.
7. A. Morris, B. Voight, T. Teslovich, T. Ferreira, A. Segre, V. Steinthorsdottir, R. Strawbridge, H. Khan, H. Grallert, A. Mahajan, Prokopenko, et al., Large-scale association analysis provides insights into the genetic architecture and pathophysiology of type 2 diabetes., *Nat Genet* 44 (9) (2012) 981–990.
8. Tobacco, G. Consortium, et al., Genome-wide meta-analyses identify multiple loci associated with smoking behavior, *Nature genetics* 42 (5) (2010) 441–447.
9. J. R. Perry, F. Day, C. E. Elks, P. Sulem, D. J. Thompson, T. Ferreira, C. He, D. I. Chasman, T. Esko, G. Thorleifsson, et al., Parent-of-origin-specific allelic associations among 106 genomic loci for age at menarche, *Nature* 514 (7520) (2014) 92–97.
10. F. R. Day, K. S. Ruth, D. J. Thompson, K. L. Lunetta, N. Pervjakova, D. I. Chasman, L. Stolk, H. K. Finucane, P. Sulem, B. Bulik-Sullivan, et al., Large-scale genomic analyses link reproductive aging to hypothalamic signaling, breast cancer susceptibility and brca1-mediated dna repair, *Nature genetics* 47 (11) (2015) 1294–1303.
11. F. Hormozdiari, S. Gazal, B. van de Geijn, H. Finucane, C. J.-T. Ju, P.-R. Loh, A. Schoech, Y. Reshef, X. Liu, L. O’Connor, et al., Leveraging molecular qtl to understand the genetic architecture of diseases and complex traits, *bioRxiv* (2017) 203380.
12. G. Sveinbjornsson, A. Albrechtsen, F. Zink, S. A. Gudjonsson, A. Oddson, G. Måsson, H. Holm, A. Kong, U. Thorsteinsdottir, P. Sulem, et al., Weighting sequence variants based on their annotation increases power of whole-genome association studies, *Nature genetics* 48 (3) (2016) 314–317.
